# Supplementary material
Source: publisher figshare collection journal article supplement (https://springernature.figshare.com/ndownloader/files/28130889)
Supplement: Supplementary file 1 [file 28130889]

datetime	id	value
1575169200	2	0.05
1575169200	3	0.049
1575169200	5	0.067
1575169200	6	0.053
1575169200	9	0.046
1575170100	2	0.04
1575170100	3	0.049
1575170100	5	0.067
1575170100	6	0.053
1575170100	9	0.034
1575171000	2	0.024
1575171000	3	0.049
1575171000	5	0.062
1575171000	6	0.052
1575171000	9	0.093
1575171900	2	0.042
1575171900	3	0.048
1575171900	5	0.06
1575171900	6	0.051
1575171900	9	0.06
1575172800	2	0.038
1575172800	3	0.049
1575172800	5	0.058
1575172800	6	0.051
1575172800	9	0.223
1575173700	2	0.038
1575173700	3	0.049
1575173700	5	0.051
1575173700	6	0.05
1575173700	9	0.041
1575174600	2	0.036
1575174600	3	0.048
1575174600	5	0.038
1575174600	6	0.031
1575174600	9	0.025
1575175500	2	0.034
1575175500	3	0.05
1575175500	5	0.038
1575175500	6	0.011
1575175500	9	0.14
1575176400	2	0.012
1575176400	3	0.05
1575176400	5	0.036
1575176400	6	0.012
1575176400	9	0.023
1575177300	2	0.036
1575177300	3	0.049
1575177300	5	0.038
1575177300	6	0.011
1575177300	9	0.027
1575178200	2	0.011
1575178200	3	0.05
1575178200	5	0.038
1575178200	6	0.012
1575178200	9	0.0
1575179100	2	0.035
1575179100	3	0.049
1575179100	5	0.037
1575179100	6	0.007
1575179100	9	0.056
1575180000	2	0.012
1575180000	3	0.05
1575180000	5	0.038
1575180000	6	0.004
1575180000	9	0.049
1575180900	2	0.029
1575180900	3	0.05
1575180900	5	0.024
1575180900	6	0.003
1575180900	9	0.0
1575181800	2	0.017
1575181800	3	0.049
1575181800	5	0.022
1575181800	6	0.003
1575181800	9	0.0
1575182700	2	0.021
1575182700	3	0.049
1575182700	5	0.042
1575182700	6	0.003
1575182700	9	0.079
1575183600	2	0.025
1575183600	3	0.049
1575183600	5	0.046
1575183600	6	0.003
1575183600	9	0.025
1575184500	2	0.012
1575184500	3	0.05
1575184500	5	0.045
1575184500	6	0.003
1575184500	9	0.0
1575185400	2	0.032
1575185400	3	0.049
1575185400	5	0.043
1575185400	6	0.004
1575185400	9	0.03
1575186300	2	0.012
1575186300	3	0.05
1575186300	5	0.043
1575186300	6	0.003
1575186300	9	0.029
1575187200	2	0.022
1575187200	3	0.05
1575187200	5	0.025
1575187200	6	0.003
1575187200	9	0.043
1575188100	2	0.023
1575188100	3	0.029
1575188100	5	0.022
1575188100	6	0.003
1575188100	9	0.121
1575189000	2	0.01
1575189000	3	0.0
1575189000	5	0.021
1575189000	6	0.003
1575189000	9	0.047
1575189900	2	0.03
1575189900	3	0.0
1575189900	5	0.022
1575189900	6	0.004
1575189900	9	0.0
1575190800	2	0.015
1575190800	3	0.0
1575190800	5	0.025
1575190800	6	0.003
1575190800	9	0.036
1575191700	2	0.017
1575191700	3	0.0
1575191700	5	0.022
1575191700	6	0.003
1575191700	9	0.044
1575192600	2	0.028
1575192600	3	0.0
1575192600	5	0.021
1575192600	6	0.003
1575192600	9	0.021
1575193500	2	0.01
1575193500	3	0.0
1575193500	5	0.022
1575193500	6	0.004
1575193500	9	0.0
1575194400	2	0.021
1575194400	3	0.0
1575194400	5	0.021
1575194400	6	0.003
1575194400	9	0.022
1575195300	2	0.024
1575195300	3	0.0
1575195300	5	0.022
1575195300	6	0.002
1575195300	9	0.076
1575196200	2	0.056
1575196200	3	0.0
1575196200	5	0.04
1575196200	6	0.029
1575196200	9	0.001
1575197100	2	0.031
1575197100	3	0.0
1575197100	5	0.046
1575197100	6	0.048
1575197100	9	0.001
1575198000	2	0.015
1575198000	3	0.0
1575198000	5	0.045
1575198000	6	0.048
1575198000	9	0.036
1575198900	2	0.052
1575198900	3	0.0
1575198900	5	0.043
1575198900	6	0.046
1575198900	9	0.047
1575199800	2	0.052
1575199800	3	0.0
1575199800	5	0.043
1575199800	6	0.043
1575199800	9	0.017
1575200700	2	0.023
1575200700	3	0.0
1575200700	5	0.025
1575200700	6	0.04
1575200700	9	0.027
1575201600	2	0.034
1575201600	3	0.0
1575201600	5	0.022
1575201600	6	0.003
1575201600	9	0.131
1575202500	2	0.012
1575202500	3	0.0
1575202500	5	0.022
1575202500	6	0.003
1575202500	9	0.015
1575203400	2	0.025
1575203400	3	0.0
1575203400	5	0.021
1575203400	6	0.003
1575203400	9	0.038
1575204300	2	0.024
1575204300	3	0.0
1575204300	5	0.022
1575204300	6	0.002
1575204300	9	0.055
1575205200	2	0.017
1575205200	3	0.0
1575205200	5	0.031
1575205200	6	0.003
1575205200	9	0.001
1575206100	2	0.058
1575206100	3	0.0
1575206100	5	0.032
1575206100	6	0.003
1575206100	9	0.001
1575207000	2	0.044
1575207000	3	0.0
1575207000	5	0.036
1575207000	6	0.004
1575207000	9	0.061
1575207900	2	0.045
1575207900	3	0.0
1575207900	5	0.034
1575207900	6	0.005
1575207900	9	0.082
1575208800	2	0.056
1575208800	3	0.0
1575208800	5	0.032
1575208800	6	0.035
1575208800	9	0.23
1575209700	2	0.038
1575209700	3	0.0
1575209700	5	0.055
1575209700	6	0.045
1575209700	9	0.246
1575210600	2	0.052
1575210600	3	0.0
1575210600	5	0.059
1575210600	6	0.043
1575210600	9	0.326
1575211500	2	0.049
1575211500	3	0.0
1575211500	5	0.06
1575211500	6	0.038
1575211500	9	0.26
1575212400	2	0.038
1575212400	3	0.0
1575212400	5	0.058
1575212400	6	0.002
1575212400	9	0.343
1575213300	2	0.054
1575213300	3	0.0
1575213300	5	0.055
1575213300	6	0.003
1575213300	9	0.063
1575214200	2	0.062
1575214200	3	0.0
1575214200	5	0.063
1575214200	6	0.003
1575214200	9	0.044
1575215100	2	0.054
1575215100	3	0.0
1575215100	5	0.046
1575215100	6	0.006
1575215100	9	0.171
1575216000	2	0.056
1575216000	3	0.0
1575216000	5	0.045
1575216000	6	0.003
1575216000	9	0.014
1575216900	2	0.041
1575216900	3	0.0
1575216900	5	0.037
1575216900	6	0.003
1575216900	9	0.107
1575217800	2	0.061
1575217800	3	0.0
1575217800	5	0.035
1575217800	6	0.011
1575217800	9	0.501
1575218700	2	0.042
1575218700	3	0.0
1575218700	5	0.036
1575218700	6	0.047
1575218700	9	0.498
1575219600	2	0.05
1575219600	3	0.0
1575219600	5	0.036
1575219600	6	0.046
1575219600	9	0.513
1575220500	2	0.052
1575220500	3	0.0
1575220500	5	0.037
1575220500	6	0.044
1575220500	9	0.104
1575221400	2	0.066
1575221400	3	0.0
1575221400	5	0.044
1575221400	6	0.026
1575221400	9	0.041
1575222300	2	0.06
1575222300	3	0.0
1575222300	5	0.044
1575222300	6	0.002
1575222300	9	0.023
1575223200	2	0.061
1575223200	3	0.0
1575223200	5	0.06
1575223200	6	0.02
1575223200	9	0.034
1575224100	2	0.069
1575224100	3	0.0
1575224100	5	0.057
1575224100	6	0.051
1575224100	9	0.03
1575225000	2	0.067
1575225000	3	0.0
1575225000	5	0.055
1575225000	6	0.037
1575225000	9	0.046
1575225900	2	0.065
1575225900	3	0.0
1575225900	5	0.054
1575225900	6	0.215
1575225900	9	0.038
1575226800	2	0.048
1575226800	3	0.0
1575226800	5	0.054
1575226800	6	0.008
1575226800	9	0.001
1575227700	2	0.014
1575227700	3	0.0
1575227700	5	0.041
1575227700	6	0.023
1575227700	9	0.061
1575228600	2	0.038
1575228600	3	0.0
1575228600	5	0.034
1575228600	6	0.046
1575228600	9	0.053
1575229500	2	0.014
1575229500	3	0.0
1575229500	5	0.037
1575229500	6	0.044
1575229500	9	0.04
1575230400	2	0.033
1575230400	3	0.0
1575230400	5	0.039
1575230400	6	0.044
1575230400	9	0.051
1575231300	2	0.019
1575231300	3	0.0
1575231300	5	0.049
1575231300	6	0.041
1575231300	9	0.1
1575232200	2	0.025
1575232200	3	0.0
1575232200	5	0.048
1575232200	6	0.011
1575232200	9	0.208
1575233100	2	0.041
1575233100	3	0.0
1575233100	5	0.048
1575233100	6	0.011
1575233100	9	0.014
1575234000	2	0.042
1575234000	3	0.0
1575234000	5	0.046
1575234000	6	0.05
1575234000	9	0.044
1575234900	2	0.088
1575234900	3	0.0
1575234900	5	0.045
1575234900	6	0.056
1575234900	9	0.037
1575235800	2	0.063
1575235800	3	0.0
1575235800	5	0.059
1575235800	6	0.056
1575235800	9	0.031
1575236700	2	0.039
1575236700	3	0.0
1575236700	5	0.057
1575236700	6	0.017
1575236700	9	0.052
1575237600	2	0.056
1575237600	3	0.0
1575237600	5	0.63
1575237600	6	0.012
1575237600	9	0.015
1575238500	2	0.045
1575238500	3	0.0
1575238500	5	0.072
1575238500	6	0.009
1575238500	9	0.047
1575239400	2	0.047
1575239400	3	0.0
1575239400	5	0.171
1575239400	6	0.008
1575239400	9	0.087
1575240300	2	0.058
1575240300	3	0.0
1575240300	5	0.046
1575240300	6	0.049
1575240300	9	0.021
1575241200	2	0.04
1575241200	3	0.0
1575241200	5	0.047
1575241200	6	0.05
1575241200	9	0.017
1575242100	2	0.066
1575242100	3	0.045
1575242100	5	0.092
1575242100	6	0.049
1575242100	9	0.071
1575243000	2	0.023
1575243000	3	0.048
1575243000	5	0.068
1575243000	6	0.049
1575243000	9	0.072
1575243900	2	0.035
1575243900	3	0.049
1575243900	5	0.058
1575243900	6	0.05
1575243900	9	0.007
1575244800	2	0.036
1575244800	3	0.048
1575244800	5	0.058
1575244800	6	0.049
1575244800	9	0.042
1575245700	2	0.022
1575245700	3	0.048
1575245700	5	0.057
1575245700	6	0.05
1575245700	9	0.068
1575246600	2	0.042
1575246600	3	0.048
1575246600	5	0.057
1575246600	6	0.042
1575246600	9	0.052
1575247500	2	0.028
1575247500	3	0.049
1575247500	5	0.058
1575247500	6	0.041
1575247500	9	0.016
1575248400	2	0.029
1575248400	3	0.048
1575248400	5	0.084
1575248400	6	0.005
1575248400	9	0.067
1575249300	2	0.041
1575249300	3	0.049
1575249300	5	0.082
1575249300	6	0.003
1575249300	9	0.026
1575250200	2	0.022
1575250200	3	0.048
1575250200	5	0.08
1575250200	6	0.003
1575250200	9	0.061
1575251100	2	0.033
1575251100	3	0.048
1575251100	5	0.079
1575251100	6	0.003
1575251100	9	0.048
1575252000	2	0.037
1575252000	3	0.049
1575252000	5	0.078
1575252000	6	0.004
1575252000	9	0.018
1575252900	2	0.022
1575252900	3	0.048
1575252900	5	0.058
1575252900	6	0.003
1575252900	9	0.001
1575253800	2	0.037
1575253800	3	0.049
1575253800	5	0.066
1575253800	6	0.003
1575253800	9	0.206
1575254700	2	0.036
1575254700	3	0.049
1575254700	5	0.081
1575254700	6	0.003
1575254700	9	0.05
1575255600	2	0.023
1575255600	3	0.048
1575255600	5	0.063
1575255600	6	0.003
1575255600	9	0.0
1575256500	2	0.039
1575256500	3	0.049
1575256500	5	0.037
1575256500	6	0.003
1575256500	9	0.0
1575257400	2	0.02
1575257400	3	0.05
1575257400	5	0.026
1575257400	6	0.003
1575257400	9	0.068
1575258300	2	0.015
1575258300	3	0.049
1575258300	5	0.025
1575258300	6	0.003
1575258300	9	0.035
1575259200	2	0.029
1575259200	3	0.049
1575259200	5	0.026
1575259200	6	0.003
1575259200	9	0.0
1575260100	2	0.017
1575260100	3	0.049
1575260100	5	0.026
1575260100	6	0.003
1575260100	9	0.0
1575261000	2	0.017
1575261000	3	0.05
1575261000	5	0.806
1575261000	6	0.003
1575261000	9	0.075
1575261900	2	0.029
1575261900	3	0.049
1575261900	5	0.52
1575261900	6	0.003
1575261900	9	0.028
1575262800	2	0.015
1575262800	3	0.049
1575262800	5	0.055
1575262800	6	0.003
1575262800	9	0.0
1575263700	2	0.018
1575263700	3	0.049
1575263700	5	0.053
1575263700	6	0.004
1575263700	9	0.015
1575264600	2	0.029
1575264600	3	0.05
1575264600	5	0.043
1575264600	6	0.004
1575264600	9	0.045
1575265500	2	0.013
1575265500	3	0.05
1575265500	5	0.035
1575265500	6	0.004
1575265500	9	0.04
1575266400	2	0.02
1575266400	3	0.05
1575266400	5	0.021
1575266400	6	0.004
1575266400	9	0.0
1575267300	2	0.028
1575267300	3	0.05
1575267300	5	0.021
1575267300	6	0.005
1575267300	9	0.03
1575268200	2	0.012
1575268200	3	0.05
1575268200	5	0.021
1575268200	6	0.004
1575268200	9	0.02
1575269100	2	0.02
1575269100	3	0.05
1575269100	5	0.021
1575269100	6	0.005
1575269100	9	0.043
1575270000	2	0.028
1575270000	3	0.05
1575270000	5	0.021
1575270000	6	0.004
1575270000	9	0.008
1575270900	2	0.012
1575270900	3	0.05
1575270900	5	0.021
1575270900	6	0.004
1575270900	9	0.04
1575271800	2	0.02
1575271800	3	0.05
1575271800	5	0.021
1575271800	6	0.004
1575271800	9	0.009
1575272700	2	0.028
1575272700	3	0.051
1575272700	5	0.021
1575272700	6	0.003
1575272700	9	0.025
1575273600	2	0.012
1575273600	3	0.05
1575273600	5	0.021
1575273600	6	0.003
1575273600	9	0.026
1575274500	2	0.04
1575274500	3	0.03
1575274500	5	0.021
1575274500	6	0.003
1575274500	9	0.044
1575275400	2	0.032
1575275400	3	0.0
1575275400	5	0.042
1575275400	6	0.029
1575275400	9	0.005
1575276300	2	0.034
1575276300	3	0.0
1575276300	5	0.063
1575276300	6	0.045
1575276300	9	0.049
1575277200	2	0.042
1575277200	3	0.0
1575277200	5	0.047
1575277200	6	0.044
1575277200	9	0.142
1575278100	2	0.038
1575278100	3	0.0
1575278100	5	0.045
1575278100	6	0.038
1575278100	9	0.048
1575279000	2	0.037
1575279000	3	0.0
1575279000	5	0.043
1575279000	6	0.003
1575279000	9	0.0
1575279900	2	0.014
1575279900	3	0.0
1575279900	5	0.043
1575279900	6	0.003
1575279900	9	0.0
1575280800	2	0.036
1575280800	3	0.0
1575280800	5	0.026
1575280800	6	0.006
1575280800	9	0.033
1575281700	2	0.012
1575281700	3	0.0
1575281700	5	0.021
1575281700	6	0.006
1575281700	9	0.065
1575282600	2	0.028
1575282600	3	0.0
1575282600	5	0.021
1575282600	6	0.006
1575282600	9	0.001
1575283500	2	0.022
1575283500	3	0.0
1575283500	5	0.022
1575283500	6	0.004
1575283500	9	0.001
1575284400	2	0.013
1575284400	3	0.0
1575284400	5	0.021
1575284400	6	0.003
1575284400	9	0.017
1575285300	2	0.03
1575285300	3	0.0
1575285300	5	0.021
1575285300	6	0.004
1575285300	9	0.08
1575286200	2	0.074
1575286200	3	0.0
1575286200	5	0.025
1575286200	6	0.003
1575286200	9	0.16
1575287100	2	0.052
1575287100	3	0.0
1575287100	5	0.017
1575287100	6	0.044
1575287100	9	0.053
1575288000	2	0.055
1575288000	3	0.0
1575288000	5	0.001
1575288000	6	0.045
1575288000	9	0.039
1575288900	2	0.044
1575288900	3	0.0
1575288900	5	0.002
1575288900	6	0.049
1575288900	9	0.085
1575289800	2	0.041
1575289800	3	0.0
1575289800	5	0.008
1575289800	6	0.014
1575289800	9	0.076
1575290700	2	0.017
1575290700	3	0.0
1575290700	5	0.029
1575290700	6	0.15
1575290700	9	0.0
1575291600	2	0.036
1575291600	3	0.0
1575291600	5	0.027
1575291600	6	0.485
1575291600	9	0.017
1575292500	2	0.016
1575292500	3	0.0
1575292500	5	0.024
1575292500	6	0.007
1575292500	9	0.041
1575293400	2	0.027
1575293400	3	0.0
1575293400	5	0.023
1575293400	6	0.004
1575293400	9	0.042
1575294300	2	0.026
1575294300	3	0.0
1575294300	5	0.022
1575294300	6	0.003
1575294300	9	0.0
1575295200	2	0.024
1575295200	3	0.0
1575295200	5	0.011
1575295200	6	0.004
1575295200	9	0.035
1575296100	2	0.03
1575296100	3	0.0
1575296100	5	0.007
1575296100	6	0.004
1575296100	9	0.011
1575297000	2	0.019
1575297000	3	0.0
1575297000	5	0.006
1575297000	6	0.003
1575297000	9	0.041
1575297900	2	0.037
1575297900	3	0.0
1575297900	5	0.005
1575297900	6	0.004
1575297900	9	0.017
1575298800	2	0.041
1575298800	3	0.0
1575298800	5	0.002
1575298800	6	0.003
1575298800	9	0.04
1575299700	2	0.053
1575299700	3	0.0
1575299700	5	0.002
1575299700	6	0.003
1575299700	9	0.0
1575300600	2	0.053
1575300600	3	0.0
1575300600	5	0.002
1575300600	6	0.003
1575300600	9	0.024
1575301500	2	0.04
1575301500	3	0.0
1575301500	5	0.002
1575301500	6	0.02
1575301500	9	0.065
1575302400	2	0.058
1575302400	3	0.0
1575302400	5	0.017
1575302400	6	0.029
1575302400	9	0.009
1575303300	2	0.047
1575303300	3	0.0
1575303300	5	0.035
1575303300	6	0.03
1575303300	9	0.0
1575304200	2	0.057
1575304200	3	0.0
1575304200	5	0.043
1575304200	6	0.003
1575304200	9	0.022
1575305100	2	0.046
1575305100	3	0.0
1575305100	5	0.038
1575305100	6	0.034
1575305100	9	0.191
1575306000	2	0.06
1575306000	3	0.0
1575306000	5	0.036
1575306000	6	0.046
1575306000	9	0.026
1575306900	2	0.046
1575306900	3	0.0
1575306900	5	0.021
1575306900	6	0.044
1575306900	9	0.0
1575307800	2	0.058
1575307800	3	0.0
1575307800	5	0.005
1575307800	6	0.044
1575307800	9	0.045
1575308700	2	0.044
1575308700	3	0.0
1575308700	5	0.005
1575308700	6	0.043
1575308700	9	0.043
1575309600	2	0.061
1575309600	3	0.0
1575309600	5	0.004
1575309600	6	0.042
1575309600	9	0.011
1575310500	2	0.037
1575310500	3	0.0
1575310500	5	0.022
1575310500	6	0.042
1575310500	9	0.03
1575311400	2	0.026
1575311400	3	0.0
1575311400	5	0.025
1575311400	6	0.041
1575311400	9	0.016
1575312300	2	0.035
1575312300	3	0.0
1575312300	5	0.025
1575312300	6	0.01
1575312300	9	0.03
1575313200	2	0.042
1575313200	3	0.0
1575313200	5	0.023
1575313200	6	0.002
1575313200	9	0.043
1575314100	2	0.065
1575314100	3	0.0
1575314100	5	0.022
1575314100	6	0.002
1575314100	9	0.087
1575315000	2	0.025
1575315000	3	0.0
1575315000	5	0.021
1575315000	6	0.027
1575315000	9	0.105
1575315900	2	0.039
1575315900	3	0.0
1575315900	5	0.044
1575315900	6	0.041
1575315900	9	0.095
1575316800	2	0.014
1575316800	3	0.0
1575316800	5	0.046
1575316800	6	0.026
1575316800	9	0.143
1575317700	2	0.035
1575317700	3	0.0
1575317700	5	0.051
1575317700	6	0.003
1575317700	9	0.065
1575318600	2	0.018
1575318600	3	0.0
1575318600	5	0.043
1575318600	6	0.002
1575318600	9	0.078
1575319500	2	0.029
1575319500	3	0.0
1575319500	5	0.041
1575319500	6	0.002
1575319500	9	0.108
1575320400	2	0.035
1575320400	3	0.0
1575320400	5	0.024
1575320400	6	0.002
1575320400	9	0.131
1575321300	2	0.063
1575321300	3	0.0
1575321300	5	0.022
1575321300	6	0.002
1575321300	9	0.061
1575322200	2	0.044
1575322200	3	0.0
1575322200	5	0.031
1575322200	6	0.002
1575322200	9	0.044
1575323100	2	0.066
1575323100	3	0.0
1575323100	5	0.054
1575323100	6	0.002
1575323100	9	0.028
1575324000	2	0.067
1575324000	3	0.0
1575324000	5	0.052
1575324000	6	0.002
1575324000	9	0.05
1575324900	2	0.057
1575324900	3	0.0
1575324900	5	0.048
1575324900	6	0.002
1575324900	9	0.049
1575325800	2	0.066
1575325800	3	0.0
1575325800	5	0.05
1575325800	6	0.017
1575325800	9	0.046
1575326700	2	0.069
1575326700	3	0.0
1575326700	5	0.052
1575326700	6	0.054
1575326700	9	0.024
1575327600	2	0.068
1575327600	3	0.01
1575327600	5	0.051
1575327600	6	0.053
1575327600	9	0.053
1575328500	2	0.067
1575328500	3	0.048
1575328500	5	0.061
1575328500	6	0.053
1575328500	9	0.313
1575329400	2	0.053
1575329400	3	0.048
1575329400	5	0.081
1575329400	6	0.022
1575329400	9	0.18
1575330300	2	0.047
1575330300	3	0.048
1575330300	5	0.087
1575330300	6	0.197
1575330300	9	0.004
1575331200	2	0.029
1575331200	3	0.049
1575331200	5	0.086
1575331200	6	0.076
1575331200	9	0.123
1575332100	2	0.04
1575332100	3	0.049
1575332100	5	0.753
1575332100	6	0.02
1575332100	9	0.063
1575333000	2	0.037
1575333000	3	0.049
1575333000	5	0.857
1575333000	6	0.002
1575333000	9	0.005
1575333900	2	0.034
1575333900	3	0.05
1575333900	5	0.069
1575333900	6	0.002
1575333900	9	0.012
1575334800	2	0.035
1575334800	3	0.049
1575334800	5	0.071
1575334800	6	0.002
1575334800	9	0.055
1575335700	2	0.035
1575335700	3	0.049
1575335700	5	0.068
1575335700	6	0.002
1575335700	9	0.063
1575336600	2	0.032
1575336600	3	0.049
1575336600	5	0.068
1575336600	6	0.002
1575336600	9	0.173
1575337500	2	0.038
1575337500	3	0.049
1575337500	5	0.07
1575337500	6	0.028
1575337500	9	0.081
1575338400	2	0.025
1575338400	3	0.05
1575338400	5	0.05
1575338400	6	0.043
1575338400	9	0.017
1575339300	2	0.041
1575339300	3	0.049
1575339300	5	0.045
1575339300	6	0.041
1575339300	9	0.262
1575340200	2	0.012
1575340200	3	0.049
1575340200	5	0.036
1575340200	6	0.015
1575340200	9	0.221
1575341100	2	0.033
1575341100	3	0.048
1575341100	5	0.04
1575341100	6	0.002
1575341100	9	0.039
1575342000	2	0.017
1575342000	3	0.049
1575342000	5	0.058
1575342000	6	0.002
1575342000	9	0.016
1575342900	2	0.023
1575342900	3	0.048
1575342900	5	0.045
1575342900	6	0.002
1575342900	9	0.109
1575343800	2	0.026
1575343800	3	0.049
1575343800	5	0.043
1575343800	6	0.002
1575343800	9	0.108
1575344700	2	0.015
1575344700	3	0.048
1575344700	5	0.042
1575344700	6	0.002
1575344700	9	0.003
1575345600	2	0.034
1575345600	3	0.049
1575345600	5	0.034
1575345600	6	0.002
1575345600	9	0.0
1575346500	2	0.012
1575346500	3	0.049
1575346500	5	0.021
1575346500	6	0.003
1575346500	9	0.017
1575347400	2	0.027
1575347400	3	0.049
1575347400	5	0.021
1575347400	6	0.002
1575347400	9	0.054
1575348300	2	0.023
1575348300	3	0.048
1575348300	5	0.021
1575348300	6	0.002
1575348300	9	0.023
1575349200	2	0.015
1575349200	3	0.048
1575349200	5	0.021
1575349200	6	0.002
1575349200	9	0.0
1575350100	2	0.032
1575350100	3	0.049
1575350100	5	0.021
1575350100	6	0.002
1575350100	9	0.035
1575351000	2	0.014
1575351000	3	0.048
1575351000	5	0.021
1575351000	6	0.044
1575351000	9	0.015
1575351900	2	0.023
1575351900	3	0.048
1575351900	5	0.02
1575351900	6	0.042
1575351900	9	0.043
1575352800	2	0.025
1575352800	3	0.048
1575352800	5	0.021
1575352800	6	0.037
1575352800	9	0.0
1575353700	2	0.012
1575353700	3	0.048
1575353700	5	0.021
1575353700	6	0.002
1575353700	9	0.043
1575354600	2	0.03
1575354600	3	0.047
1575354600	5	0.021
1575354600	6	0.002
1575354600	9	0.0
1575355500	2	0.019
1575355500	3	0.047
1575355500	5	0.043
1575355500	6	0.003
1575355500	9	0.029
1575356400	2	0.016
1575356400	3	0.048
1575356400	5	0.05
1575356400	6	0.002
1575356400	9	0.16
1575357300	2	0.031
1575357300	3	0.048
1575357300	5	0.048
1575357300	6	0.002
1575357300	9	0.021
1575358200	2	0.013
1575358200	3	0.047
1575358200	5	0.045
1575358200	6	0.002
1575358200	9	0.0
1575359100	2	0.022
1575359100	3	0.047
1575359100	5	0.042
1575359100	6	0.002
1575359100	9	0.002
1575360000	2	0.026
1575360000	3	0.048
1575360000	5	0.021
1575360000	6	0.002
1575360000	9	0.088
1575360900	2	0.012
1575360900	3	0.031
1575360900	5	0.021
1575360900	6	0.002
1575360900	9	0.0
1575361800	2	0.025
1575361800	3	0.0
1575361800	5	0.021
1575361800	6	0.003
1575361800	9	0.0
1575362700	2	0.023
1575362700	3	0.0
1575362700	5	0.022
1575362700	6	0.002
1575362700	9	0.016
1575363600	2	0.011
1575363600	3	0.0
1575363600	5	0.021
1575363600	6	0.002
1575363600	9	0.055
1575364500	2	0.029
1575364500	3	0.0
1575364500	5	0.022
1575364500	6	0.002
1575364500	9	0.026
1575365400	2	0.019
1575365400	3	0.0
1575365400	5	0.041
1575365400	6	0.003
1575365400	9	0.0
1575366300	2	0.015
1575366300	3	0.0
1575366300	5	0.032
1575366300	6	0.006
1575366300	9	0.028
1575367200	2	0.028
1575367200	3	0.0
1575367200	5	0.022
1575367200	6	0.006
1575367200	9	0.014
1575368100	2	0.015
1575368100	3	0.0
1575368100	5	0.021
1575368100	6	0.027
1575368100	9	0.037
1575369000	2	0.018
1575369000	3	0.0
1575369000	5	0.027
1575369000	6	0.045
1575369000	9	0.01
1575369900	2	0.028
1575369900	3	0.0
1575369900	5	0.067
1575369900	6	0.042
1575369900	9	0.163
1575370800	2	0.012
1575370800	3	0.0
1575370800	5	0.163
1575370800	6	0.04
1575370800	9	0.001
1575371700	2	0.021
1575371700	3	0.0
1575371700	5	0.043
1575371700	6	0.027
1575371700	9	0.001
1575372600	2	0.026
1575372600	3	0.0
1575372600	5	0.046
1575372600	6	0.028
1575372600	9	0.063
1575373500	2	0.01
1575373500	3	0.0
1575373500	5	0.023
1575373500	6	0.006
1575373500	9	0.096
1575374400	2	0.074
1575374400	3	0.0
1575374400	5	0.021
1575374400	6	0.024
1575374400	9	0.092
1575375300	2	0.018
1575375300	3	0.0
1575375300	5	0.021
1575375300	6	0.045
1575375300	9	0.001
1575376200	2	0.038
1575376200	3	0.0
1575376200	5	0.021
1575376200	6	0.043
1575376200	9	0.066
1575377100	2	0.023
1575377100	3	0.0
1575377100	5	0.027
1575377100	6	0.042
1575377100	9	0.117
1575378000	2	0.041
1575378000	3	0.0
1575378000	5	0.021
1575378000	6	0.041
1575378000	9	0.0
1575378900	2	0.039
1575378900	3	0.0
1575378900	5	0.022
1575378900	6	0.041
1575378900	9	0.001
1575379800	2	0.037
1575379800	3	0.0
1575379800	5	0.021
1575379800	6	0.04
1575379800	9	0.043
1575380700	2	0.035
1575380700	3	0.0
1575380700	5	0.023
1575380700	6	0.04
1575380700	9	0.024
1575381600	2	0.017
1575381600	3	0.0
1575381600	5	0.029
1575381600	6	0.031
1575381600	9	0.027
1575382500	2	0.027
1575382500	3	0.0
1575382500	5	0.052
1575382500	6	0.002
1575382500	9	0.011
1575383400	2	0.018
1575383400	3	0.0
1575383400	5	0.046
1575383400	6	0.017
1575383400	9	0.035
1575384300	2	0.028
1575384300	3	0.0
1575384300	5	0.044
1575384300	6	0.04
1575384300	9	0.0
1575385200	2	0.041
1575385200	3	0.0
1575385200	5	0.045
1575385200	6	0.028
1575385200	9	0.044
1575386100	2	0.057
1575386100	3	0.0
1575386100	5	0.041
1575386100	6	0.002
1575386100	9	0.029
1575387000	2	0.068
1575387000	3	0.0
1575387000	5	0.023
1575387000	6	0.002
1575387000	9	0.136
1575387900	2	0.073
1575387900	3	0.0
1575387900	5	0.022
1575387900	6	0.002
1575387900	9	0.0
1575388800	2	0.038
1575388800	3	0.0
1575388800	5	0.027
1575388800	6	0.002
1575388800	9	0.022
1575389700	2	0.064
1575389700	3	0.0
1575389700	5	0.035
1575389700	6	0.003
1575389700	9	0.072
1575390600	2	0.031
1575390600	3	0.0
1575390600	5	0.026
1575390600	6	0.004
1575390600	9	0.002
1575391500	2	0.023
1575391500	3	0.0
1575391500	5	0.021
1575391500	6	0.002
1575391500	9	0.0
1575392400	2	0.031
1575392400	3	0.0
1575392400	5	0.021
1575392400	6	0.193
1575392400	9	0.021
1575393300	2	0.018
1575393300	3	0.0
1575393300	5	0.021
1575393300	6	0.043
1575393300	9	0.073
1575394200	2	0.031
1575394200	3	0.0
1575394200	5	0.022
1575394200	6	0.028
1575394200	9	0.002
1575395100	2	0.017
1575395100	3	0.0
1575395100	5	0.039
1575395100	6	0.002
1575395100	9	0.0
1575396000	2	0.031
1575396000	3	0.0
1575396000	5	0.049
1575396000	6	0.002
1575396000	9	0.043
1575396900	2	0.018
1575396900	3	0.0
1575396900	5	0.046
1575396900	6	0.002
1575396900	9	0.036
1575397800	2	0.028
1575397800	3	0.0
1575397800	5	0.044
1575397800	6	0.002
1575397800	9	0.018
1575398700	2	0.039
1575398700	3	0.0
1575398700	5	0.042
1575398700	6	0.002
1575398700	9	0.041
1575399600	2	0.051
1575399600	3	0.0
1575399600	5	0.035
1575399600	6	0.003
1575399600	9	0.002
1575400500	2	0.061
1575400500	3	0.0
1575400500	5	0.02
1575400500	6	0.002
1575400500	9	0.02
1575401400	2	0.043
1575401400	3	0.0
1575401400	5	0.021
1575401400	6	0.029
1575401400	9	0.063
1575402300	2	0.057
1575402300	3	0.0
1575402300	5	0.023
1575402300	6	0.043
1575402300	9	0.014
1575403200	2	0.04
1575403200	3	0.0
1575403200	5	0.031
1575403200	6	0.027
1575403200	9	0.0
1575404100	2	0.06
1575404100	3	0.0
1575404100	5	0.021
1575404100	6	0.002
1575404100	9	0.024
1575405000	2	0.036
1575405000	3	0.0
1575405000	5	0.02
1575405000	6	0.002
1575405000	9	0.07
1575405900	2	0.064
1575405900	3	0.0
1575405900	5	0.021
1575405900	6	0.002
1575405900	9	0.001
1575406800	2	0.051
1575406800	3	0.0
1575406800	5	0.021
1575406800	6	0.002
1575406800	9	0.013
1575407700	2	0.079
1575407700	3	0.0
1575407700	5	0.036
1575407700	6	0.002
1575407700	9	0.029
1575408600	2	0.051
1575408600	3	0.0
1575408600	5	0.055
1575408600	6	0.024
1575408600	9	0.035
1575409500	2	0.048
1575409500	3	0.0
1575409500	5	0.048
1575409500	6	0.044
1575409500	9	0.166
1575410400	2	0.049
1575410400	3	0.0
1575410400	5	0.294
1575410400	6	0.037
1575410400	9	0.046
1575411300	2	0.051
1575411300	3	0.0
1575411300	5	0.874
1575411300	6	0.019
1575411300	9	0.016
1575412200	2	0.054
1575412200	3	0.0
1575412200	5	0.043
1575412200	6	0.047
1575412200	9	0.055
1575413100	2	0.045
1575413100	3	0.011
1575413100	5	0.029
1575413100	6	0.047
1575413100	9	0.082
1575414000	2	0.063
1575414000	3	0.047
1575414000	5	0.021
1575414000	6	0.051
1575414000	9	0.005
1575414900	2	0.039
1575414900	3	0.047
1575414900	5	0.019
1575414900	6	0.04
1575414900	9	0.011
1575415800	2	0.042
1575415800	3	0.048
1575415800	5	0.019
1575415800	6	0.008
1575415800	9	0.043
1575416700	2	0.021
1575416700	3	0.047
1575416700	5	0.02
1575416700	6	0.002
1575416700	9	0.046
1575417600	2	0.047
1575417600	3	0.048
1575417600	5	0.02
1575417600	6	0.002
1575417600	9	0.002
1575418500	2	0.022
1575418500	3	0.048
1575418500	5	0.028
1575418500	6	0.003
1575418500	9	0.046
1575419400	2	0.039
1575419400	3	0.049
1575419400	5	0.06
1575419400	6	0.002
1575419400	9	0.002
1575420300	2	0.03
1575420300	3	0.048
1575420300	5	0.1
1575420300	6	0.002
1575420300	9	0.039
1575421200	2	0.049
1575421200	3	0.049
1575421200	5	0.244
1575421200	6	0.002
1575421200	9	0.044
1575422100	2	0.049
1575422100	3	0.048
1575422100	5	1.416
1575422100	6	0.008
1575422100	9	0.014
1575423000	2	0.035
1575423000	3	0.05
1575423000	5	0.26
1575423000	6	0.043
1575423000	9	0.002
1575423900	2	0.054
1575423900	3	0.049
1575423900	5	0.061
1575423900	6	0.027
1575423900	9	0.038
1575424800	2	0.051
1575424800	3	0.049
1575424800	5	0.053
1575424800	6	0.027
1575424800	9	0.077
1575425700	2	0.048
1575425700	3	0.049
1575425700	5	0.036
1575425700	6	0.011
1575425700	9	0.017
1575426600	2	0.037
1575426600	3	0.049
1575426600	5	0.049
1575426600	6	0.016
1575426600	9	0.017
1575427500	2	0.028
1575427500	3	0.05
1575427500	5	0.032
1575427500	6	0.045
1575427500	9	0.059
1575428400	2	0.016
1575428400	3	0.049
1575428400	5	0.027
1575428400	6	0.044
1575428400	9	0.108
1575429300	2	0.031
1575429300	3	0.049
1575429300	5	0.023
1575429300	6	0.042
1575429300	9	0.065
1575430200	2	0.014
1575430200	3	0.05
1575430200	5	0.023
1575430200	6	0.042
1575430200	9	0.031
1575431100	2	0.027
1575431100	3	0.049
1575431100	5	0.022
1575431100	6	0.004
1575431100	9	0.012
1575432000	2	0.018
1575432000	3	0.05
1575432000	5	0.023
1575432000	6	0.003
1575432000	9	0.024
1575432900	2	0.02
1575432900	3	0.049
1575432900	5	0.021
1575432900	6	0.042
1575432900	9	0.037
1575433800	2	0.025
1575433800	3	0.05
1575433800	5	0.046
1575433800	6	0.024
1575433800	9	0.031
1575434700	2	0.012
1575434700	3	0.049
1575434700	5	0.044
1575434700	6	0.003
1575434700	9	0.0
1575435600	2	0.031
1575435600	3	0.05
1575435600	5	0.043
1575435600	6	0.002
1575435600	9	0.0
1575436500	2	0.011
1575436500	3	0.049
1575436500	5	0.042
1575436500	6	0.002
1575436500	9	0.088
1575437400	2	0.024
1575437400	3	0.049
1575437400	5	0.033
1575437400	6	0.002
1575437400	9	0.004
1575438300	2	0.02
1575438300	3	0.049
1575438300	5	0.019
1575438300	6	0.002
1575438300	9	0.0
1575439200	2	0.014
1575439200	3	0.048
1575439200	5	0.02
1575439200	6	0.002
1575439200	9	0.015
1575440100	2	0.03
1575440100	3	0.049
1575440100	5	0.02
1575440100	6	0.003
1575440100	9	0.05
1575441000	2	0.009
1575441000	3	0.048
1575441000	5	0.02
1575441000	6	0.002
1575441000	9	0.025
1575441900	2	0.023
1575441900	3	0.049
1575441900	5	0.02
1575441900	6	0.002
1575441900	9	0.0
1575442800	2	0.021
1575442800	3	0.047
1575442800	5	0.02
1575442800	6	0.002
1575442800	9	0.044
1575443700	2	0.01
1575443700	3	0.048
1575443700	5	0.02
1575443700	6	0.026
1575443700	9	0.0
1575444600	2	0.028
1575444600	3	0.048
1575444600	5	0.02
1575444600	6	0.043
1575444600	9	0.042
1575445500	2	0.014
1575445500	3	0.048
1575445500	5	0.02
1575445500	6	0.042
1575445500	9	0.012
1575446400	2	0.017
1575446400	3	0.048
1575446400	5	0.026
1575446400	6	0.007
1575446400	9	0.039
1575447300	2	0.026
1575447300	3	0.044
1575447300	5	0.045
1575447300	6	0.002
1575447300	9	0.0
1575448200	2	0.008
1575448200	3	0.0
1575448200	5	0.044
1575448200	6	0.002
1575448200	9	0.014
1575449100	2	0.024
1575449100	3	0.0
1575449100	5	0.043
1575449100	6	0.003
1575449100	9	0.051
1575450000	2	0.02
1575450000	3	0.0
1575450000	5	0.043
1575450000	6	0.002
1575450000	9	0.026
1575450900	2	0.01
1575450900	3	0.0
1575450900	5	0.031
1575450900	6	0.002
1575450900	9	0.0
1575451800	2	0.026
1575451800	3	0.0
1575451800	5	0.026
1575451800	6	0.002
1575451800	9	0.15
1575452700	2	0.015
1575452700	3	0.0
1575452700	5	0.022
1575452700	6	0.005
1575452700	9	0.074
1575453600	2	0.014
1575453600	3	0.0
1575453600	5	0.023
1575453600	6	0.033
1575453600	9	0.02
1575454500	2	0.026
1575454500	3	0.0
1575454500	5	0.023
1575454500	6	0.046
1575454500	9	0.0
1575455400	2	0.011
1575455400	3	0.0
1575455400	5	0.021
1575455400	6	0.042
1575455400	9	0.004
1575456300	2	0.018
1575456300	3	0.0
1575456300	5	0.021
1575456300	6	0.041
1575456300	9	0.048
1575457200	2	0.026
1575457200	3	0.0
1575457200	5	0.021
1575457200	6	0.041
1575457200	9	0.042
1575458100	2	0.055
1575458100	3	0.0
1575458100	5	0.02
1575458100	6	0.013
1575458100	9	0.001
1575459000	2	0.026
1575459000	3	0.0
1575459000	5	0.021
1575459000	6	0.002
1575459000	9	0.018
1575459900	2	0.018
1575459900	3	0.0
1575459900	5	0.031
1575459900	6	0.002
1575459900	9	0.031
1575460800	2	0.021
1575460800	3	0.0
1575460800	5	0.046
1575460800	6	0.002
1575460800	9	0.019
1575461700	2	0.023
1575461700	3	0.0
1575461700	5	0.044
1575461700	6	0.002
1575461700	9	0.028
1575462600	2	0.012
1575462600	3	0.0
1575462600	5	0.044
1575462600	6	0.002
1575462600	9	0.045
1575463500	2	0.03
1575463500	3	0.0
1575463500	5	0.049
1575463500	6	0.002
1575463500	9	0.002
1575464400	2	0.009
1575464400	3	0.0
1575464400	5	0.03
1575464400	6	0.003
1575464400	9	0.001
1575465300	2	0.023
1575465300	3	0.0
1575465300	5	0.022
1575465300	6	0.002
1575465300	9	0.032
1575466200	2	0.02
1575466200	3	0.0
1575466200	5	0.02
1575466200	6	0.002
1575466200	9	0.067
1575467100	2	0.012
1575467100	3	0.0
1575467100	5	0.021
1575467100	6	0.004
1575467100	9	0.005
1575468000	2	0.033
1575468000	3	0.0
1575468000	5	0.025
1575468000	6	0.003
1575468000	9	0.0
1575468900	2	0.036
1575468900	3	0.0
1575468900	5	0.023
1575468900	6	0.04
1575468900	9	0.0
1575469800	2	0.006
1575469800	3	0.0
1575469800	5	0.021
1575469800	6	0.045
1575469800	9	0.092
1575470700	2	0.036
1575470700	3	0.0
1575470700	5	0.031
1575470700	6	0.043
1575470700	9	0.005
1575471600	2	0.017
1575471600	3	0.0
1575471600	5	0.042
1575471600	6	0.067
1575471600	9	0.0
1575472500	2	0.026
1575472500	3	0.0
1575472500	5	0.239
1575472500	6	0.087
1575472500	9	0.019
1575473400	2	0.047
1575473400	3	0.0
1575473400	5	0.047
1575473400	6	0.047
1575473400	9	0.059
1575474300	2	0.066
1575474300	3	0.0
1575474300	5	0.046
1575474300	6	0.057
1575474300	9	0.154
1575475200	2	0.049
1575475200	3	0.0
1575475200	5	0.043
1575475200	6	0.064
1575475200	9	0.0
1575476100	2	0.071
1575476100	3	0.0
1575476100	5	0.038
1575476100	6	0.043
1575476100	9	0.04
1575477000	2	0.068
1575477000	3	0.0
1575477000	5	0.021
1575477000	6	0.015
1575477000	9	0.007
1575477900	2	0.065
1575477900	3	0.0
1575477900	5	0.021
1575477900	6	0.019
1575477900	9	0.032
1575478800	2	0.154
1575478800	3	0.0
1575478800	5	0.021
1575478800	6	0.036
1575478800	9	0.025
1575479700	2	0.037
1575479700	3	0.0
1575479700	5	0.022
1575479700	6	0.05
1575479700	9	0.038
1575480600	2	0.011
1575480600	3	0.0
1575480600	5	0.021
1575480600	6	0.177
1575480600	9	0.0
1575481500	2	0.037
1575481500	3	0.0
1575481500	5	0.026
1575481500	6	0.043
1575481500	9	0.008
1575482400	2	0.014
1575482400	3	0.0
1575482400	5	0.022
1575482400	6	0.039
1575482400	9	0.063
1575483300	2	0.036
1575483300	3	0.0
1575483300	5	0.021
1575483300	6	0.039
1575483300	9	0.023
1575484200	2	0.014
1575484200	3	0.0
1575484200	5	0.021
1575484200	6	0.028
1575484200	9	0.0
1575485100	2	0.033
1575485100	3	0.0
1575485100	5	0.039
1575485100	6	0.043
1575485100	9	0.002
1575486000	2	0.016
1575486000	3	0.0
1575486000	5	0.046
1575486000	6	0.046
1575486000	9	0.056
1575486900	2	0.029
1575486900	3	0.0
1575486900	5	0.044
1575486900	6	0.049
1575486900	9	0.02
1575487800	2	0.032
1575487800	3	0.0
1575487800	5	0.157
1575487800	6	0.02
1575487800	9	0.0
1575488700	2	0.018
1575488700	3	0.0
1575488700	5	0.402
1575488700	6	0.013
1575488700	9	0.0
1575489600	2	0.031
1575489600	3	0.0
1575489600	5	0.031
1575489600	6	0.013
1575489600	9	0.162
1575490500	2	0.013
1575490500	3	0.0
1575490500	5	0.023
1575490500	6	0.013
1575490500	9	0.013
1575491400	2	0.034
1575491400	3	0.0
1575491400	5	0.024
1575491400	6	0.013
1575491400	9	0.0
1575492300	2	0.016
1575492300	3	0.0
1575492300	5	0.022
1575492300	6	0.023
1575492300	9	0.001
1575493200	2	0.037
1575493200	3	0.0
1575493200	5	0.021
1575493200	6	0.056
1575493200	9	0.061
1575494100	2	0.047
1575494100	3	0.0
1575494100	5	0.022
1575494100	6	0.054
1575494100	9	0.015
1575495000	2	0.052
1575495000	3	0.0
1575495000	5	0.022
1575495000	6	0.015
1575495000	9	0.015
1575495900	2	0.049
1575495900	3	0.0
1575495900	5	0.025
1575495900	6	0.042
1575495900	9	0.014
1575496800	2	0.043
1575496800	3	0.0
1575496800	5	0.024
1575496800	6	0.054
1575496800	9	0.066
1575497700	2	0.058
1575497700	3	0.0
1575497700	5	0.024
1575497700	6	0.054
1575497700	9	0.017
1575498600	2	0.041
1575498600	3	0.0
1575498600	5	0.045
1575498600	6	0.023
1575498600	9	0.015
1575499500	2	0.059
1575499500	3	0.0
1575499500	5	0.055
1575499500	6	0.013
1575499500	9	0.016
1575500400	2	0.042
1575500400	3	0.0
1575500400	5	0.06
1575500400	6	0.013
1575500400	9	0.067
1575501300	2	0.055
1575501300	3	0.037
1575501300	5	0.06
1575501300	6	0.013
1575501300	9	0.021
1575502200	2	0.027
1575502200	3	0.048
1575502200	5	0.077
1575502200	6	0.055
1575502200	9	0.017
1575503100	2	0.029
1575503100	3	0.048
1575503100	5	0.084
1575503100	6	0.055
1575503100	9	0.021
1575504000	2	0.039
1575504000	3	0.047
1575504000	5	0.082
1575504000	6	0.053
1575504000	9	0.287
1575504900	2	0.022
1575504900	3	0.048
1575504900	5	1.088
1575504900	6	0.118
1575504900	9	0.277
1575505800	2	0.038
1575505800	3	0.049
1575505800	5	0.573
1575505800	6	0.135
1575505800	9	0.027
1575506700	2	0.03
1575506700	3	0.048
1575506700	5	0.294
1575506700	6	0.057
1575506700	9	0.091
1575507600	2	0.027
1575507600	3	0.049
1575507600	5	0.234
1575507600	6	0.056
1575507600	9	0.085
1575508500	2	0.042
1575508500	3	0.048
1575508500	5	0.044
1575508500	6	0.053
1575508500	9	0.017
1575509400	2	0.021
1575509400	3	0.049
1575509400	5	0.028
1575509400	6	0.052
1575509400	9	0.018
1575510300	2	0.034
1575510300	3	0.049
1575510300	5	0.022
1575510300	6	0.046
1575510300	9	0.017
1575511200	2	0.035
1575511200	3	0.048
1575511200	5	0.022
1575511200	6	0.043
1575511200	9	0.061
1575512100	2	0.027
1575512100	3	0.049
1575512100	5	0.032
1575512100	6	0.042
1575512100	9	0.115
1575513000	2	0.029
1575513000	3	0.049
1575513000	5	0.031
1575513000	6	0.016
1575513000	9	0.007
1575513900	2	0.016
1575513900	3	0.05
1575513900	5	0.056
1575513900	6	0.005
1575513900	9	0.0
1575514800	2	0.016
1575514800	3	0.05
1575514800	5	0.055
1575514800	6	0.004
1575514800	9	0.029
1575515700	2	0.028
1575515700	3	0.049
1575515700	5	0.043
1575515700	6	0.004
1575515700	9	0.022
1575516600	2	0.01
1575516600	3	0.049
1575516600	5	0.043
1575516600	6	0.003
1575516600	9	0.0
1575517500	2	0.022
1575517500	3	0.048
1575517500	5	0.042
1575517500	6	0.003
1575517500	9	0.0
1575518400	2	0.023
1575518400	3	0.049
1575518400	5	0.028
1575518400	6	0.003
1575518400	9	0.011
1575519300	2	0.009
1575519300	3	0.048
1575519300	5	0.021
1575519300	6	0.004
1575519300	9	0.039
1575520200	2	0.027
1575520200	3	0.049
1575520200	5	0.02
1575520200	6	0.003
1575520200	9	0.0
1575521100	2	0.017
1575521100	3	0.049
1575521100	5	0.021
1575521100	6	0.003
1575521100	9	0.0
1575522000	2	0.014
1575522000	3	0.049
1575522000	5	0.021
1575522000	6	0.004
1575522000	9	0.0
1575522900	2	0.028
1575522900	3	0.05
1575522900	5	0.021
1575522900	6	0.003
1575522900	9	0.051
1575523800	2	0.012
1575523800	3	0.05
1575523800	5	0.021
1575523800	6	0.003
1575523800	9	0.008
1575524700	2	0.019
1575524700	3	0.049
1575524700	5	0.021
1575524700	6	0.003
1575524700	9	0.048
1575525600	2	0.033
1575525600	3	0.049
1575525600	5	0.021
1575525600	6	0.035
1575525600	9	0.047
1575526500	2	0.037
1575526500	3	0.049
1575526500	5	0.021
1575526500	6	0.045
1575526500	9	0.169
1575527400	2	0.022
1575527400	3	0.05
1575527400	5	0.046
1575527400	6	0.036
1575527400	9	0.023
1575528300	2	0.042
1575528300	3	0.048
1575528300	5	0.045
1575528300	6	0.028
[truncated: 8,000 more rows]
